# Supplementary material
Source: publisher figshare collection journal article supplement (https://acs.figshare.com/ndownloader/files/5576335)
Supplement: Supplementary file 1 [file 5576335]

## Supporting Information

# Structural and Electrochemical Properties of Li ion Solvation Complexes in the Salt-Concentrated Electrolytes Using an Aprotic Donor Solvent, *N,N*- Dimethylformamide

*Kenta Fujii,\* Hideaki Wakamatsu, Yanko Todorov, Nobuko Yoshimoto, and Masayuki Morita.*

Graduate School of Sciences and Technology for Innovation, Yamaguchi University, 2-16-1  
Tokiwadai, Ube, Yamaguchi 755-8611.

KEYWORDS. Li salt-concentrated electrolytes,  $\text{Li}^+$  ion complexes, *N,N*-dimethylformamide (DMF),  $\text{Li}^+$  ion batteries.

**Distribution of TFSA species from Raman data.** Total concentration of TFSA anions,  $c_T$ , in LiTFSA/DMF solutions is given by the equation,  $c_T = c_f + c_b$ , where  $c_f$  and  $c_b$  are the free and bound TFSA anions. The integrated intensity of the free TFSA is given by  $I_f = J_f c_f$ . Here, note that no coordination of TFSA anions occurs at low LiTFSA concentrations ( $c_{Li} < 2.0 \text{ mol dm}^{-3}$ );  $\text{Li}^+$  ions are solvated only by DMF molecules, meaning that all of the TFSA anions exist as a free TFSA in the bulk and  $c_{Li} = c_f$ . Thus, the slope of the  $I_f$  vs.  $c_{Li}$  shown below figure corresponds to the  $J_{f(\text{TFSA})}$  value ( $= 0.66$ ) in this system and then we can experimentally estimate the  $c_f$  value in a given  $c_{Li}$  solutions. In the  $c_{Li}$  range  $2.0\text{--}2.5 \text{ mol dm}^{-3}$ , the TFSA anions coordinate with  $\text{Li}^+$  ions in a monodentate manner, not in a bidentate one. The  $c_T$  is thus represented by  $c_T = c_f + c_{b(\text{mono})}$  in this  $c_{Li}$  range where  $c_{b(\text{mono})}$  is the monodentate bound TFSA. As the result, the  $c_{b(\text{mono})}$  ( $= c_T - c_f$ ) can be determined and the  $J_{b(\text{mono})}$  can be also determined using the relationship of  $I_{b(\text{mono})} = J_{b(\text{mono})} c_{b(\text{mono})}$  where  $I_{b(\text{mono})}$  is the integrated intensity of bound mono-TFSA observed at  $747.3 \text{ cm}^{-1}$ . Finally, the concentration of bound TFSA with bidentate manner,  $c_{b(\text{bi})}$ , in the solutions with  $c_{Li} > 2.5 \text{ mol dm}^{-3}$ , is obtained as follows;  $c_{b(\text{bi})} = c_T - c_f - c_{b(\text{mono})}$ . The distribution functions of free, mono-, and bi-TFSA species in the solutions are thus calculated by  $c_f/c_T$ ,  $c_{b(\text{mono})}/c_T$ , and  $c_{b(\text{bi})}/c_T$ , respectively. The  $J_{b(\text{mono})}$  and  $J_{b(\text{bi})}$  values obtained here were 0.65 and 0.72, respectively.

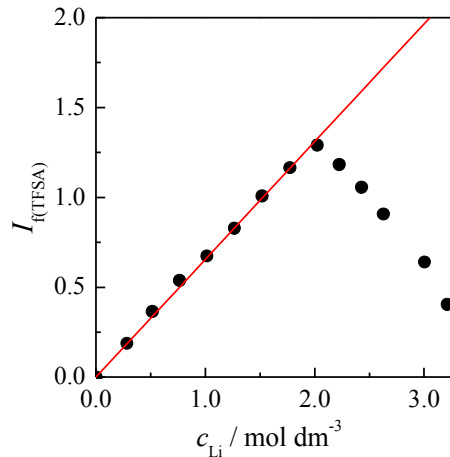

Table S1. Molar concentration ( $c_{\text{Li}}$ ), mole fraction ( $x_{\text{Li}}$ ), and density ( $d$ ) values of LiTFSA in DMF solutions.

| $c_{\text{Li}} / \text{mol dm}^{-3}$ | $x_{\text{Li}}$ | $d / \text{g cm}^{-3}$ |
|--------------------------------------|-----------------|------------------------|
| 0                                    | 0               | 0.9445                 |
| 0.28                                 | 0.02            | 0.9877                 |
| 0.52                                 | 0.04            | 1.0232                 |
| 0.77                                 | 0.06            | 1.0611                 |
| 1.01                                 | 0.08            | 1.0985                 |
| 1.27                                 | 0.11            | 1.1376                 |
| 1.52                                 | 0.13            | 1.1775                 |
| 1.77                                 | 0.16            | 1.2150                 |
| 2.02                                 | 0.18            | 1.2527                 |
| 2.22                                 | 0.20            | 1.2825                 |
| 2.43                                 | 0.22            | 1.3123                 |
| 2.63                                 | 0.25            | 1.3433                 |
| 3.00                                 | 0.29            | 1.3947                 |
| 3.21                                 | 0.32            | 1.4251                 |

Table S2. HOMO and LUMO energy levels, and binding energies ( $\Delta E_{\text{bind}}$ ) of the isolated DMF and TFSA anions (cis and trans conformers) and the  $\text{Li}^+$  ion complexes with various coordination structures (shown in Figure S2). The parentheses (DMF or TFSA) indicate the species where the HOMO or LUMO appears.

|            | HOMO / eV    | LUMO / eV    | $\Delta E_{\text{bind}}^a / \text{kJ mol}^{-1}$ |
|------------|--------------|--------------|-------------------------------------------------|
| DMF        | −6.96        | −0.16        |                                                 |
| cis-TFSA   | −0.16        | 0.11         |                                                 |
| trans-TFSA | −0.16        | 0.11         |                                                 |
| <b>1a</b>  | −9.58        | −2.70        | −543.23                                         |
| <b>1b</b>  | −5.79        | −1.66        | −740.87                                         |
| <b>1c</b>  | −7.20 (DMF)  | −0.62 (DMF)  | −761.71                                         |
| <b>1d</b>  | −7.57 (DMF)  | −0.79 (DMF)  | −726.66                                         |
| <b>1e</b>  | −4.91 (DMF)  | 1.24 (DMF)   | −786.18                                         |
| <b>1f</b>  | −5.18 (DMF)  | 1.31 (DMF)   | −761.46                                         |
| <b>1g</b>  | −3.07 (DMF)  | 3.07 (DMF)   | −622.22                                         |
| <hr/>      |              |              |                                                 |
| <b>2a</b>  | −10.31 (DMF) | −3.35 (TFSA) | −1072.04                                        |
| <b>2b</b>  | −9.97 (DMF)  | −3.60 (TFSA) | −1039.61                                        |
| <b>2c</b>  | −9.95 (DMF)  | −3.88 (TFSA) | −1007.89                                        |
| <b>2d</b>  | −9.56 (DMF)  | −3.37 (TFSA) | −1100.77                                        |
| <b>2e</b>  | −9.64 (DMF)  | −3.06 (DMF)  | −1169.40                                        |
| <b>2f</b>  | −9.75 (DMF)  | −3.03 (DMF)  | −1149.85                                        |
| <b>2g</b>  | −9.48 (DMF)  | −2.69 (DMF)  | −1237.64                                        |

<sup>a</sup> The  $\Delta E_{\text{bind}}$  for the  $[\text{Li}_x(\text{DMF})_n(\text{TFSA})_m]$  was calculated as the SCF energy difference between the optimized complex and single components ( $\text{Li}^+$ , DMF and  $\text{TFSA}^-$ ) according to  $\Delta E_{\text{bind}} = E_{\text{SCF}}(\text{complex}) - xE_{\text{SCF}}(\text{Li}^+) - nE_{\text{SCF}}(\text{DMF}) - mE_{\text{SCF}}(\text{TFSA})$ , and then corrected by basis set superposition error (BSSE) using the counterpoise method.

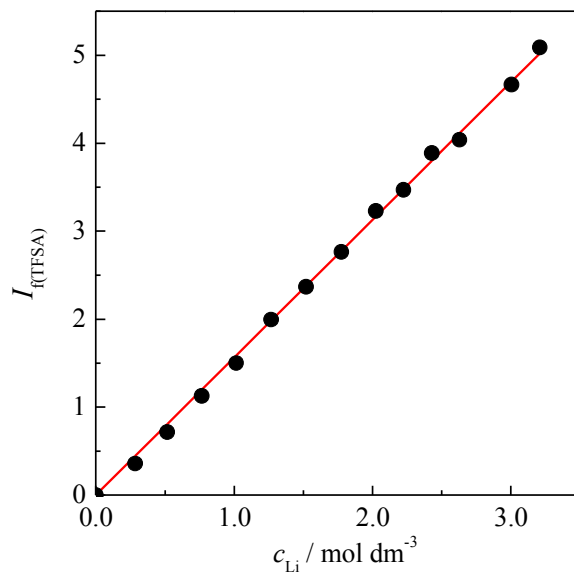

**Figure S1.** Raman intensities at  $1339.0 \text{ cm}^{-1}$ , which is attributed to TFSA, plotted against  $c_{\text{Li}}$ . The  $1339.0 \text{ cm}^{-1}$  band linearly increases with increasing  $c_{\text{Li}}$ , irrespective of coordination to Li ion and thus was used as an internal standard in normalization of the observed Raman spectra.

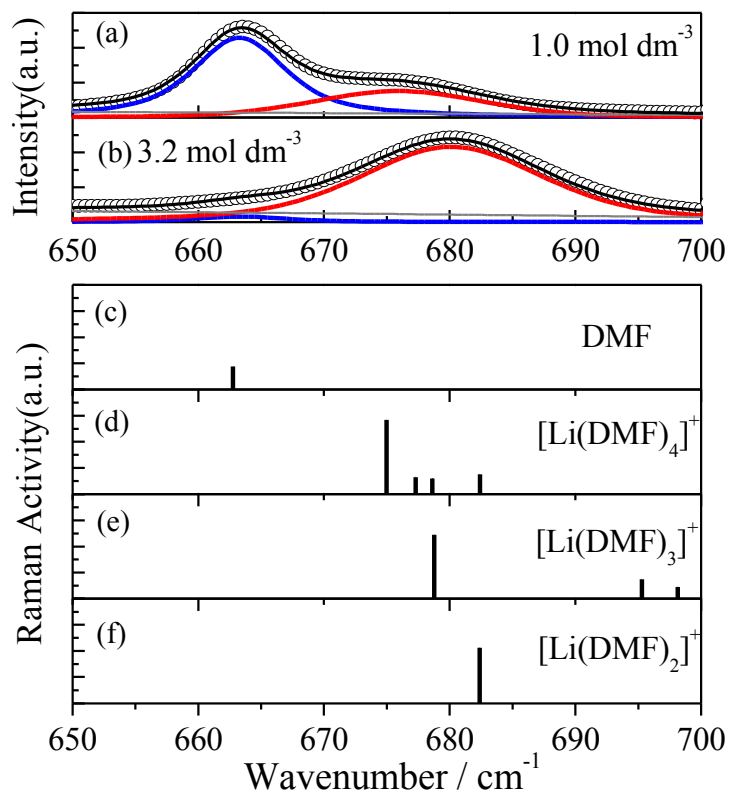

**Figure S2.** The observed Raman spectra for (a) 1.0 and (b) 3.2  $\text{mol dm}^{-3}$  LiTFSA/DMF solutions and the theoretical Raman bands calculated for (c) isolated DMF, (d)  $[\text{Li}(\text{DMF})_4]^+$ , (e)  $[\text{Li}(\text{DMF})_3]^+$ , and (f)  $[\text{Li}(\text{DMF})_2]^+$  complexes by DFT calculations.

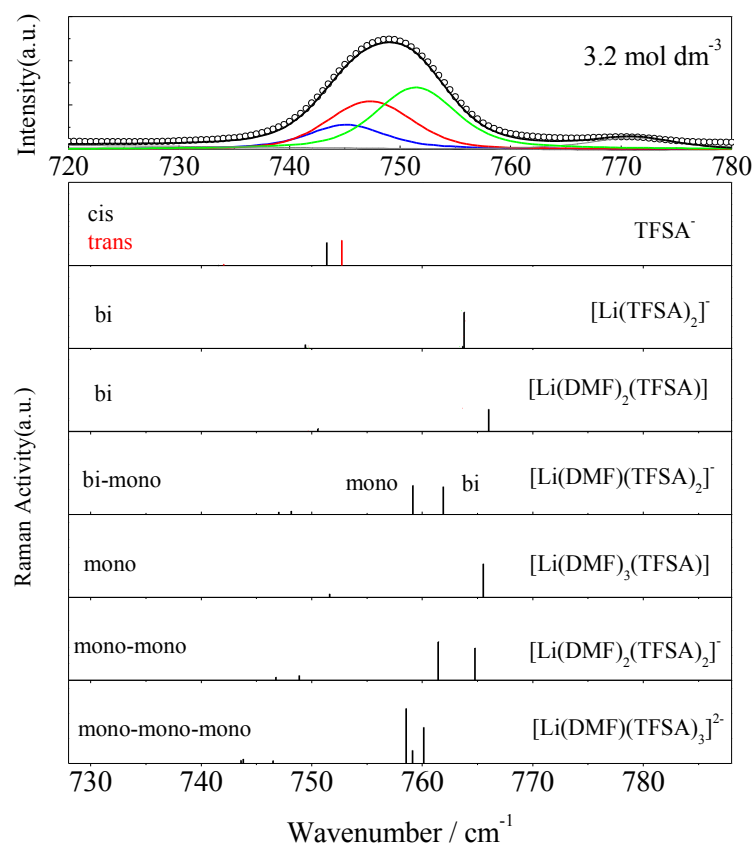

**Figure S3.** The theoretical Raman bands calculated for  $[\text{Li}(\text{DMF})_n(\text{TFSA})_m]$  complexes by DFT calculations, together with the observed spectrum for LiTFSA/DMF solution with  $c_{\text{Li}} = 3.2 \text{ mol dm}^{-3}$ .

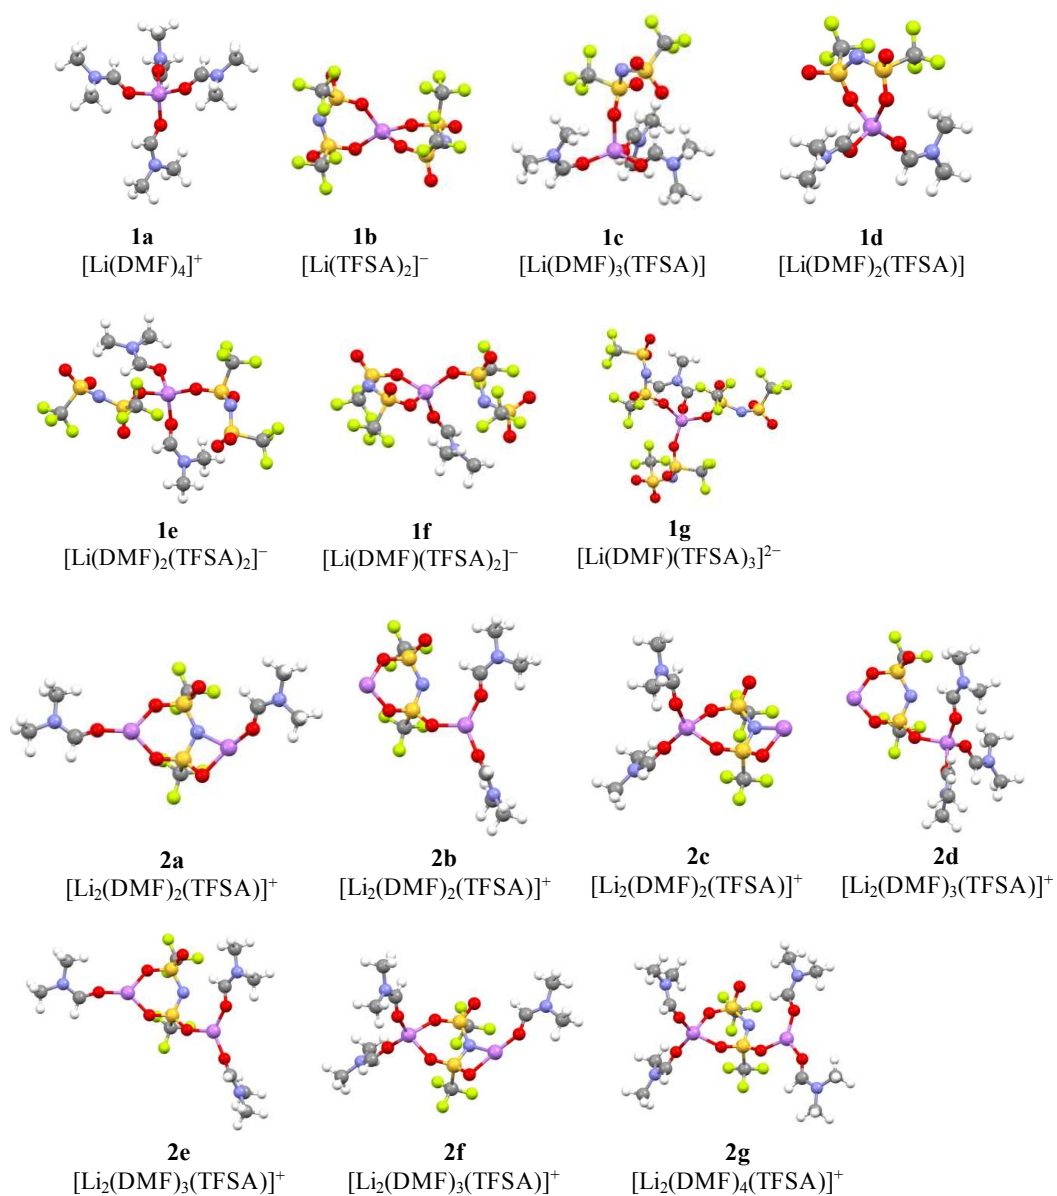

**Figure S4.** The optimized geometries of mononuclear (**1a–g**) and binuclear (**2a–g**) Li-ion complexes by DFT calculations.



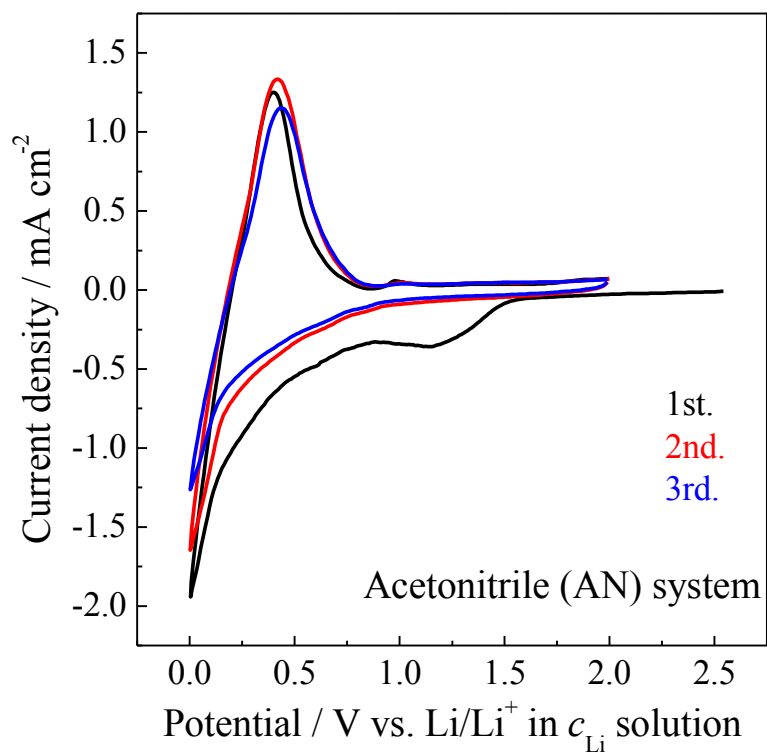

**Figure S5.** CV profiles for graphite electrode in LiTFSA/acetonitrile electrolyte solution ( $c_{\text{Li}} = 3.7 \text{ mol dm}^{-3}$ ).
